# Supplementary material
Source: ML conference proceedings conference paper supplement (https://openaccess.thecvf.com/content/CVPR_2019/html/Lindell_Acoustic_Non-Line-Of-Sight_Imaging_CVPR_2019_paper.html)
Supplement: Supplementary file 1 [file Lindell_Acoustic_Non-Line-Of-Sight_Imaging_CVPR_2019_supplemental.zip]

Archive with 2 entries (2 files):
- 2059_supp_video.mp4
- 2059_supp.pdf
